# Supplementary material for: Political Prioritisation for Performance-Based Financing at the County Level in Kenya: 2015 to 2018
Source: PubMed Central journal article supplement (PMC10125155; doi:10.34172/ijhpm.2023.6909), 2023-02-14
Supplement: ijhpm-12-6909-s002.pdf [file ijhpm-12-6909-s002.pdf]

**Article title:** Political Prioritisation for Performance-Based Financing at the County Level in Kenya: 2015 to 2018

**Journal name:** International Journal of Health Policy and Management (IJHPM)

**Authors' information:** Dennis Waithaka<sup>1\*</sup>, Lucy Gilson<sup>2,3</sup>, Edwine Barasa<sup>1,4</sup>, Benjamin Tsofa<sup>5,4</sup>, Marsha Orgill<sup>2</sup>

<sup>1</sup>Health Economics Research Unit, KEMRI-Wellcome Trust Research Programme, Nairobi, Kenya.

<sup>2</sup>Health Policy and Systems Division, School of Public Health and Family Medicine, University of Cape Town, Cape Town, South Africa.

<sup>3</sup>Department of Global Health and Development, Faculty of Public Health and Policy, London School of Hygiene and Tropical Medicine, London, UK.

<sup>4</sup>Centre for Tropical Medicine and Global Health, Nuffield Department of Medicine, University of Oxford, Oxford, UK.

<sup>5</sup>Health Systems Research Group, KEMRI-Wellcome Trust Research Programme, Kilifi, Kenya.

(\*Corresponding author: [DWaithaka@kemri-wellcome.org](mailto:DWaithaka@kemri-wellcome.org))

**Supplementary file 2.** Overview of Documents Included in the Case Study (n = 19).

| Document description                                                                                                                                                                              | Type of document                  |
|---------------------------------------------------------------------------------------------------------------------------------------------------------------------------------------------------|-----------------------------------|
| 1. The Public Financial Management Act, 2012. Author: Government of Kenya <sup>29</sup>                                                                                                           | Legislation                       |
| 2. County Allocation of Revenue Act (CARA) of 2015. Author: National treasury <sup>38</sup>                                                                                                       | Legislation                       |
| 3. Financing agreement between International Development Agency and the republic of Kenya <sup>39</sup>                                                                                           | Financing agreement               |
| 4. PBF scale up 2014 – 2016, September 2014. Author: MoH <sup>27</sup>                                                                                                                            | Operational manual- early version |
| 5. PBF scale up 2015-2018, April 2017. Author: MoH <sup>40</sup>                                                                                                                                  | Operational manual- final version |
| 6. National guidelines on the transfer of conditional grants (such as PBF) to county governments, August 2015. Author: National treasury <sup>41</sup>                                            | National operational guidelines   |
| 7. Kilifi county financial guidelines on disbursement, use and reporting PBF, published in 2017. Author: MoH <sup>42</sup>                                                                        | County operational guidelines     |
| 8. Capacity building for PBF scale up: invitation to facilitate as PBF master trainer of trainees (TOT), August 2015. Author: MoH <sup>43</sup>                                                   | Memo                              |
| 9. Capacity building for PBF scale up: Nominees for PBF trainer of trainees (TOT) workshop 14th-18th September at the Kenya School of Government, Nairobi, August 2015. Author: MoH <sup>44</sup> | Memo                              |
| 10. Capacity building for PBF scale up: Cascading PBF training in the counties, January 2016. Author: MoH <sup>45</sup>                                                                           | Memo                              |

|                                                                                                                                                                                                                                                            |                                             |
|------------------------------------------------------------------------------------------------------------------------------------------------------------------------------------------------------------------------------------------------------------|---------------------------------------------|
| 11.PBF progress update for the financial year 2015/2016. August 2016. Author: MoH <sup>46</sup>                                                                                                                                                            | Memo                                        |
| 12.PBF procurement guidelines for essential equipment. January 2017. Author: MoH <sup>47</sup>                                                                                                                                                             | Memo                                        |
| 13.Kilifi sub-county health managers appointment letters to the Joint verification Team. June 2016 and January 2018.<br>Author: Kilifi County Department of Health <sup>48</sup>                                                                           | Letter                                      |
| 14.The piloting and scaling up Performance-Based Financing (PBF) in Healthcare in a Devolved Governance System:<br>Experiences from Kenya between July 2011 and May 2015. Author: Alliance for Health Policy and Systems Research<br>(AHPSR) <sup>49</sup> | Implementation report                       |
| 15.Implementation completion and results report: The Kenya Health Sector Support Project (KHSSP), 2019. Author:<br>World Bank <sup>50</sup>                                                                                                                | KHSSP evaluation report                     |
| 16.Technical assessment of the PBF pilot project in Samburu county, Kenya <sup>51</sup>                                                                                                                                                                    | PBF pilot quantitative<br>evaluation report |
| 17.Evaluation of PBF pilot project in Samburu county, Kenya <sup>52</sup>                                                                                                                                                                                  | PBF pilot qualitative evaluation<br>report  |
| 18.RBF Health Kenya,2014. Author: World Bank Group <sup>53</sup>                                                                                                                                                                                           | Website                                     |
| 19.Kenya receives 2.5 billion Kenyan Shillings to improve healthcare, October 2016. Author: The Standard- Health <sup>54</sup>                                                                                                                             | Website                                     |

---
